# Supplementary material
Source: publisher site journal article supplement (https://cdn.jamanetwork.com/ama/content_public/journal/cardiology/935987/hoi160072supp1_prod.pdf)
Supplement: Supplementary file 1 [file hoi160072supp1_prod.pdf]

## Supplementary Online Content

Cremer PC, Wu Y, Ahmed HM, et al. Use of sex-specific clinical and exercise risk scores to identify patients at increased risk for all-cause mortality. *JAMA Cardiol*. Published online October 26, 2016. doi:10.1001/jamacardio.2016.3720

**eMethods.** Model Calibration and Creation of Risk Scores

**eTable 1.** Baseline Clinical and Exercise Data for the FIT Cohort

**eTable 2.** Univariable Associations With All-Cause Mortality

**eTable 3.** Multivariable Cox Proportional Hazards Models for Prediction of Mortality in Females and Males

**eTable 4.** Estimated 10-Year Mortality for Women in the CCF Cohort (n = 24 292) According to Sex-Specific Risk Scores

**eTable 5.** Estimated 10-Year Mortality for Men in the CCF Cohort (n = 35 585) According to Sex-Specific Risk Scores

**eFigure 1.** Predicted Survival at 10 Years in Men and Women in the Derivation Cohort

**eFigure 2.** ROC Curves in Men and Women in the CCF Validation Cohort

This supplementary material has been provided by the authors to give readers additional information about their work.

## eMethods. Model Calibration and Creation of Risk Scores

### Model Calibration

The final Cox model was first validated for Somers' Dxy rank correlation between predicted log hazard, observed survival time, and for slope shrinkage (Tables below). Bootstrapping was used (with 200 samples) to penalize for possible overfitting. Herein, "training" refers to the accuracy on the bootstrap sample used to fit the model, and "test" refers to the accuracy when this model is applied to the sample not used to fit the model. Using Table 1a as an example, the first column denotes the original index, which was -0.641. The column "Optimism" denotes the amount of overfitting by a model. The column "Corrected Index" is the original estimate minus the optimism. In this case, the bias-corrected Dxy is comparable to the original. The bias-corrected c-index (AUC) is  $c = \frac{1 + |Dxy|}{2} = 0.82$ , which performs well at predicting outcome.

#### Model validation results (Female)

|     | Original Sample | Training Sample | Test Sample | Optimism | Corrected Index |
|-----|-----------------|-----------------|-------------|----------|-----------------|
| Dxy | -0.641          | -0.647          | 0.636       | -0.011   | -0.630          |

#### Model validation results (Male)

|     | Original Sample | Training Sample | Test Sample | Optimism | Corrected Index |
|-----|-----------------|-----------------|-------------|----------|-----------------|
| Dxy | -0.632          | -0.633          | -0.628      | -0.004   | -0.628          |

*Creating risk scores from beta-coefficients in Cox model*

A built in function in the statistical R package, `nomogram()`, was used to construct the nomogram. Manual calculation of building the nomogram using estimated beta coefficients from the Cox model is shown below.

Assigning risk points using Beta coefficients (Women)

| Predictor                | Level    | Beta   | Absolute maximum beta value | Rank | Assigned points                 |
|--------------------------|----------|--------|-----------------------------|------|---------------------------------|
| METs                     | ≤5       | 3.4173 | 3.4173                      | 1    | 10 assigned to MAXMETs≤5        |
|                          | 5-7      | 2.6633 | 2.6633                      | 2    | $10 \times (2.6633/3.4173) = 8$ |
|                          | 7-10     | 1.4452 | 1.4452                      | 4    | $10 \times (1.4452/3.4173) = 4$ |
|                          | ≥10      |        |                             |      | 0                               |
| Abnormal HRR             | 1        | 0.6734 | 0.6734                      | 7    | $10 \times (0.6734/3.4173) = 2$ |
|                          | 0        |        |                             |      | 0                               |
| Weight                   | <50 kg   | 1.4323 | 1.4323                      | 5    | $10 \times (1.4323/3.4173) = 4$ |
|                          | 50-70 kg | 0.8718 | 0.8718                      | 6    | $10 \times (0.8718/3.4173) = 3$ |
|                          | 70-90 kg | 0.5651 | 0.5651                      | 9    | $10 \times (0.5651/3.4173) = 2$ |
|                          | ≥90      |        |                             |      | 0                               |
| ESRD                     | 1        | 1.6696 | 1.6696                      | 3    | $10 \times (1.6696/3.4173) = 5$ |
|                          | 0        |        |                             |      | 0                               |
| Age                      | >65      | 0.3430 | 0.3430                      | 11   | $10 \times (0.3430/3.4173) = 1$ |
|                          | ≤65      |        |                             |      | 0                               |
| Former or current smoker | 1        | 0.6296 | 0.6296                      | 8    | $10 \times (0.6296/3.4173) = 2$ |
|                          | 0        |        |                             |      | 0                               |
| Diabetes                 | 1        | 0.3858 | 0.3858                      | 10   | $10 \times (0.3858/3.4173) = 1$ |
|                          | 0        |        |                             |      | 0                               |

Assigning risk points using Beta coefficients (Men)

| Predictor                | Level  | Beta   | Absolute maximum beta value | Rank | Assigned points                 |
|--------------------------|--------|--------|-----------------------------|------|---------------------------------|
| METs                     | ≤8     | 1.8835 | 1.8835                      | 1    | 10 assigned to MAXMETs≤8        |
|                          | 8-10   | 1.0383 | 1.0383                      | 4    | $10 \times (1.0383/1.8835) = 6$ |
|                          | 10-12  | 0.7163 | 0.7163                      | 7    | $10 \times (0.7163/1.8835) = 4$ |
|                          | ≥12    |        |                             |      | 0                               |
| Abnormal HRR             | 1      | 0.5863 | 0.5863                      | 8    | $10 \times (0.5863/1.8835) = 3$ |
|                          | 0      |        |                             |      | 0                               |
| Weight                   | ≤80 kg | 0.2503 | 0.2503                      | 11   | $10 \times (0.2503/1.8835) = 1$ |
|                          | >80 kg |        |                             |      | 0                               |
| ESRD                     | 1      | 1.3453 | 1.3453                      | 2    | $10 \times (1.3453/1.8835) = 7$ |
|                          | 0      |        |                             |      | 0                               |
| Age                      | ≤55    |        |                             |      | 0                               |
|                          | 55-65  | 0.2437 | 0.2437                      | 12   | $10 \times (0.2437/1.8835) = 1$ |
|                          | 65-75  | 0.7186 | 0.7186                      | 6    | $10 \times (0.7186/1.8835) = 4$ |
|                          | >75    | 1.2597 | 1.2597                      | 3    | $10 \times (1.2597/1.8835) = 7$ |
| Former or current smoker | 1      | 0.2777 | 0.2777                      | 10   | $10 \times (0.2777/1.8835) = 1$ |
|                          |        |        |                             |      |                                 |
| Hypertension             | 1      | 0.3284 | 0.3284                      | 9    | $10 \times (0.3284/1.8835) = 2$ |
|                          |        |        |                             |      |                                 |
| Heart Failure            | 1      | 1.0033 | 1.0033                      | 5    | $10 \times (1.0033/1.8835) = 5$ |
|                          |        |        |                             |      |                                 |

ESRD = End-stage renal disease; HRR = Heart rate recovery; METs = peak estimated metabolic equivalents

**eTable 1. Baseline Clinical and Exercise Data for the FIT Cohort**

Expressed as median (interquartile range) or n(%).

|                         | Total<br>(N=49,278) | Women<br>(N=23,386) | Men<br>(N=25,892) | <i>p</i> Value |
|-------------------------|---------------------|---------------------|-------------------|----------------|
| <b>Clinical Data</b>    |                     |                     |                   |                |
| Age                     | 54.4 (46.4-64.1)    | 54.5 (46.7-64.3)    | 54.3 (46.0-64.0)  | 0.001          |
| White                   | 31,512 (64%)        | 13,967 (60%)        | 17,545 (68%)      |                |
| BMI                     | 28.7 (25.4-32.8)    | 28.9 (25.1-33.7)    | 28.5 (25.7-31.9)  | <0.001         |
| History of HTN          | 33,554 (68%)        | 16,028 (69%)        | 17,526 (68%)      | 0.044          |
| History of DM           | 10,703 (21%)        | 5,001 (21%)         | 5,702 (22%)       | 0.086          |
| History of Dyslipidemia | 23,673 (48%)        | 10,795 (46%)        | 12,878 (50%)      | <0.001         |
| History of CHF          | 1,122 (2%)          | 470 (2%)            | 652 (3%)          | 0.001          |
| GFR<15                  | 234 (<1%)           | 101 (<1%)           | 133 (<1%)         | 0.187          |
| <b>Exercise Data</b>    |                     |                     |                   |                |
| Resting SBP, mmHg       | 130 (118-142)       | 130 (116-142)       | 130 (120-142)     | <0.001         |
| Resting heart rate, BPM | 72 (64-81)          | 73 (66-82)          | 70 (62-79)        | <0.001         |
| Peak SBP, mmHg          | 178 (160-196)       | 172 (156-190)       | 180 (162-200)     | <0.001         |
| Peak heart rate, BPM    | 150 (135-162)       | 150 (136-161)       | 150 (134-163)     | 0.345          |
| %MPHR Achieved          | 90.6 (85.0-96.1)    | 90.7 (85.4-96.2)    | 90.6 (84.5-96.1)  | 0.001          |
| METS Achieved           | 10 (7-10)           | 7 (7-10)            | 10 (7-13)         | <0.001         |

BMI = body mass index, BP = blood pressure, CHF = congestive heart failure, GFR = glomerular filtration rate, METs

= estimated metabolic equivalents

**eTable 2. Univariable Associations With All-Cause Mortality**

Expressed as median (interquartile range) or n (%).

|                          | Women (n=24,292)       |                  |          | Men (n=35,585)         |                 |          |
|--------------------------|------------------------|------------------|----------|------------------------|-----------------|----------|
|                          | Survived<br>(n=23,550) | Death<br>(n=742) | <i>P</i> | Survived<br>(n=33,806) | Death (n=1,779) | <i>P</i> |
| <b>Clinical Data</b>     |                        |                  |          |                        |                 |          |
| Age (years)              | 53(45-62)              | 65(55-74)        | <.001    | 53(45-62)              | 66(55.5-74)     | <.001    |
| BMI (kg/m <sup>2</sup> ) | 27.5(23.7-32.3)        | 27(23.5-31.6)    | .07      | 28.2(25.6-31.4)        | 28(25-31.3)     | .003     |
| Body Weight (kg)         | 73(63-86)              | 70(61-82)        | <.001    | 90(80-101)             | 88(77-99)       | <.001    |
| Diabetes                 | 2,468 (13)             | 167 (34)         | <.001    | 3,850 (16)             | 439 (37)        | <.001    |
| Hypertension             | 10,113 (44)            | 497 (68)         | <.001    | 15,328 (46)            | 1,204 (68)      | <.001    |
| Hyperlipidemia           | 11,178 (49)            | 432 (59)         | <.001    | 18,927 (57)            | 1,057 (60)      | .005     |
| H/O smoking              | 9,328 (40)             | 407 (55)         | <.001    | 15,978 (48)            | 1,181 (67)      | <.001    |
| Current smoker           | 2,858 (12)             | 130 (18)         | <.001    | 4,070 (12)             | 303 (17)        | <.001    |
| Family H/O CAD           | 8,389 (36)             | 266 (37)         | .73      | 10,751 (32)            | 521 (30)        | .04      |
| CAD                      | 2,039 (9)              | 186 (25)         | <.001    | 7,863 (23)             | 767 (43)        | <.001    |
| Previous MI              | 881 (4)                | 76 (10)          | <.001    | 3,459 (10)             | 350 (20)        | <.001    |
| Previous PCI             | 771 (3)                | 82 (11)          | <.001    | 3,212 (10)             | 305 (17)        | <.001    |
| Previous CABG            | 410 (2)                | 56 (8)           | <.001    | 2,385 (7)              | 330 (19)        | <.001    |
| COPD                     | 295 (2)                | 54 (9)           | <.001    | 438 (2)                | 113 (7)         | <.001    |
| Stroke/TIA               | 484 (3)                | 48 (8)           | <.001    | 708 (3)                | 110 (7)         | <.001    |
| CHF                      | 291 (2)                | 42 (7)           | <.001    | 454 (2)                | 131 (9)         | <.001    |
| ESRD                     | 65 (0)                 | 19 (3)           | <.001    | 141 (1)                | 39 (3)          | <.001    |
| PVD                      | 194 (1)                | 27 (4)           | <.001    | 376 (1)                | 87 (6)          | <.001    |

| <b>Medications</b>            |                 |                 |       |                 |                 |       |
|-------------------------------|-----------------|-----------------|-------|-----------------|-----------------|-------|
| Aspirin                       | 6,927 (29)      | 301 (41)        | <.001 | 14,515 (43)     | 949 (53)        | <.001 |
| Clopidogrel                   | 803 (3)         | 53 (7)          | <.001 | 2,309 (7)       | 174 (10)        | <.001 |
| Beta Blocker                  | 5,413 (23)      | 270 (36)        | <.001 | 8,447 (25)      | 718 (40)        | <.001 |
| ACEI/ARB                      | 4,839 (21)      | 271 (37)        | <.001 | 9,118 (27)      | 736 (41)        | <.001 |
| Statin                        | 5,697 (27)      | 253 (36)        | <.001 | 12,265 (42)     | 775 (46)        | .001  |
| <b>Exercise Data</b>          |                 |                 |       |                 |                 |       |
| Rest HR                       | 73(65-81)       | 76(67-86)       | <.001 | 67(60-76)       | 69(61-80)       | <.001 |
| Rest systolic BP              | 126(112-140)    | 136(120-150)    | <.001 | 130(118-140)    | 134(122-150)    | <.001 |
| Rest RPP                      | 9.2(7.8-10.8)   | 10.2(8.6-12.2)  | <.001 | 8.7(7.4-10.2)   | 9.2(7.9-11.2)   | <.001 |
| No ST depression              | 19,062 (81)     | 566 (76)        | .002  | 26,505 (78)     | 1,311 (74)      | <.001 |
| Chest pain                    | 532 (3)         | 20 (5)          | .04   | 984 (6)         | 87 (11)         | <.001 |
| Termination due to chest pain | 347 (1)         | 15 (2)          | .29   | 517 (2)         | 48 (3)          | <.001 |
| Maximum HR                    | 157(145-171)    | 139(125-153)    | <.001 | 160(144-171)    | 139(123-151)    | <.001 |
| Maximum RPP                   | 26.9(23.4-30.4) | 24.2(19.8-28.2) | <.001 | 29.2(25.3-32.9) | 24.5(20.2-29)   | <.001 |
| Delta RPP                     | 17.4(14-20.7)   | 13.4(9.5-17.5)  | <.001 | 20.3(16.3-23.9) | 14.7(10.4-19.1) | <.001 |
| Peak METs                     | 8(6.8-10)       | 6(5.0-7.0)      | <.001 | 10(8.5-11.6)    | 7(6.0-8.9)      | <.001 |
| Abnormal HRR                  | 3,615 (15)      | 333 (45)        | <.001 | 4,942 (15)      | 814 (46)        | <.001 |
| Abnormal CRI                  | 4,684 (20)      | 309 (42)        | <.001 | 5,493 (16)      | 670 (38)        | <.001 |
| DTS                           | 6.5(4.5-8.5)    | 4.5(2.5-5.5)    | <.001 | 8.5(5.5-10.3)   | 5.5(2.5-7.3)    | <.001 |

ACE = angiotension converting enzyme inhibitor; ARB = angiotension receptor blocker; BP= blood pressure; CABG = coronary artery bypass surgery; CAD=coronary artery disease; CCF = Cleveland Clinic Foundation; CHF= congestive heart failure; COPD= chronic obstructive lung disease; CP = chest pain; CRI = chronotropic response index; DTS = Duke Treadmill Score; Delta RPP = Maximal RPP – resting RPP; ESRD= end-stage renal disease; H/O = history of; HRR = heart rate recovery; METs = estimated metabolic equivalents; MI= myocardial infarction; PCI=percutaneous coronary intervention; PVD = peripheral vascular disease; RPP = rate-pressure product; TIA = transient ischemic attack.



**eTable 3. Multivariable Cox Proportional Hazards Models for Prediction of Mortality in Females and Males**

|                           | Female           |                | Male            |                |
|---------------------------|------------------|----------------|-----------------|----------------|
|                           | HR (95% CI)      | <i>P</i> value | HR (95% CI)     | <i>P</i> value |
| Peak METs                 | 0.67(0.63-0.72)  | <.001          | 0.73(0.70-0.76) | <.001          |
| Abnormal HRR              | 1.86(1.48-2.34)  | <.001          | 1.60(1.37-1.86) | <.001          |
| Age (yr)                  | 1.02(1.01-1.03)  | <.001          | 1.03(1.02-1.04) | <.001          |
| Weight (kg)               | 0.98(0.98-0.99)  | <.001          | 0.99(0.99-1)    | <.001          |
| ESRD                      | 4.23(1.71-10.42) | .002           | 4.33(2.72-6.9)  | <.001          |
| Former or current smoking | 1.95(1.58-2.42)  | <.001          | 1.20(1.04-1.39) | .01            |
| Diabetes                  | 1.45(1.14-1.86)  | .003           |                 |                |
| Heart Failure             |                  |                | 2.26(1.77-2.9)  | <.001          |
| Hypertension              |                  |                | 1.32(1.12-1.55) | <.001          |

CHF = congestive heart failure; ESRD = end stage renal disease; H/O = history of; HRR = heart rate recovery; METs = estimated metabolic equivalents

**eTable 4. Estimated 10-Year Mortality for Women in the CCF Cohort (n = 24 292) According to Sex-Specific Risk Scores**

| Risk score | Risk of 10 year mortality | 95%   | CI    |
|------------|---------------------------|-------|-------|
| 0          | 0.001                     | 0.001 | 0.001 |
| 1          | 0.002                     | 0.001 | 0.002 |
| 2          | 0.002                     | 0.002 | 0.003 |
| 3          | 0.003                     | 0.002 | 0.004 |
| 4          | 0.004                     | 0.003 | 0.005 |
| 5          | 0.006                     | 0.005 | 0.007 |
| 6          | 0.008                     | 0.007 | 0.009 |
| 7          | 0.011                     | 0.01  | 0.013 |
| 8          | 0.016                     | 0.014 | 0.017 |
| 9          | 0.021                     | 0.019 | 0.023 |
| 10         | 0.03                      | 0.027 | 0.032 |
| 11         | 0.04                      | 0.038 | 0.043 |
| 12         | 0.055                     | 0.051 | 0.058 |
| 13         | 0.073                     | 0.069 | 0.078 |
| 14         | 0.097                     | 0.091 | 0.103 |
| 15         | 0.126                     | 0.118 | 0.134 |
| 16         | 0.16                      | 0.149 | 0.171 |
| 17         | 0.199                     | 0.184 | 0.212 |
| 18         | 0.24                      | 0.223 | 0.256 |
| 19         | 0.282                     | 0.262 | 0.3   |
| 20         | 0.322                     | 0.302 | 0.341 |
| 21         | 0.358                     | 0.338 | 0.377 |
| 22         | 0.39                      | 0.371 | 0.407 |
| 23         | 0.416                     | 0.399 | 0.431 |
| 24         | 0.437                     | 0.423 | 0.45  |
| 25         | 0.453                     | 0.442 | 0.464 |

CCF = Cleveland Clinic Foundation, CI = Confidence Interval

**eTable 5. Estimated 10-Year Mortality for Men in the CCF Cohort (n = 35 585) According to Sex-Specific****Risk Scores**

| Risk score | Risk of 10 year mortality | 95%   | CI    |
|------------|---------------------------|-------|-------|
| 0          | 0.006                     | 0.005 | 0.006 |
| 1          | 0.007                     | 0.006 | 0.008 |
| 2          | 0.009                     | 0.008 | 0.009 |
| 3          | 0.01                      | 0.009 | 0.011 |
| 4          | 0.013                     | 0.011 | 0.014 |
| 5          | 0.015                     | 0.014 | 0.017 |
| 6          | 0.019                     | 0.017 | 0.02  |
| 7          | 0.023                     | 0.021 | 0.025 |
| 8          | 0.028                     | 0.026 | 0.03  |
| 9          | 0.034                     | 0.032 | 0.036 |
| 10         | 0.041                     | 0.038 | 0.043 |
| 11         | 0.049                     | 0.047 | 0.051 |
| 12         | 0.059                     | 0.056 | 0.061 |
| 13         | 0.07                      | 0.067 | 0.073 |
| 14         | 0.083                     | 0.08  | 0.087 |
| 15         | 0.099                     | 0.095 | 0.102 |
| 16         | 0.116                     | 0.111 | 0.12  |
| 17         | 0.135                     | 0.13  | 0.14  |
| 18         | 0.156                     | 0.15  | 0.162 |
| 19         | 0.178                     | 0.172 | 0.185 |
| 20         | 0.202                     | 0.195 | 0.21  |
| 21         | 0.227                     | 0.219 | 0.236 |
| 22         | 0.253                     | 0.243 | 0.262 |
| 23         | 0.278                     | 0.268 | 0.288 |
| 24         | 0.303                     | 0.292 | 0.314 |
| 25         | 0.327                     | 0.316 | 0.338 |
| 26         | 0.349                     | 0.338 | 0.36  |
| 27         | 0.37                      | 0.359 | 0.38  |
| 28         | 0.388                     | 0.378 | 0.398 |
| 29         | 0.405                     | 0.395 | 0.415 |
| 30         | 0.42                      | 0.411 | 0.429 |
| 31         | 0.433                     | 0.424 | 0.441 |
| 32         | 0.444                     | 0.436 | 0.451 |
| 33         | 0.453                     | 0.446 | 0.46  |
| 34         | 0.461                     | 0.455 | 0.467 |
| 35         | 0.468                     | 0.462 | 0.473 |
| 36         | 0.473                     | 0.469 | 0.478 |

**eFigure 1.** Predicted Survival at 10 Years in Men and Women in the Derivation Cohort

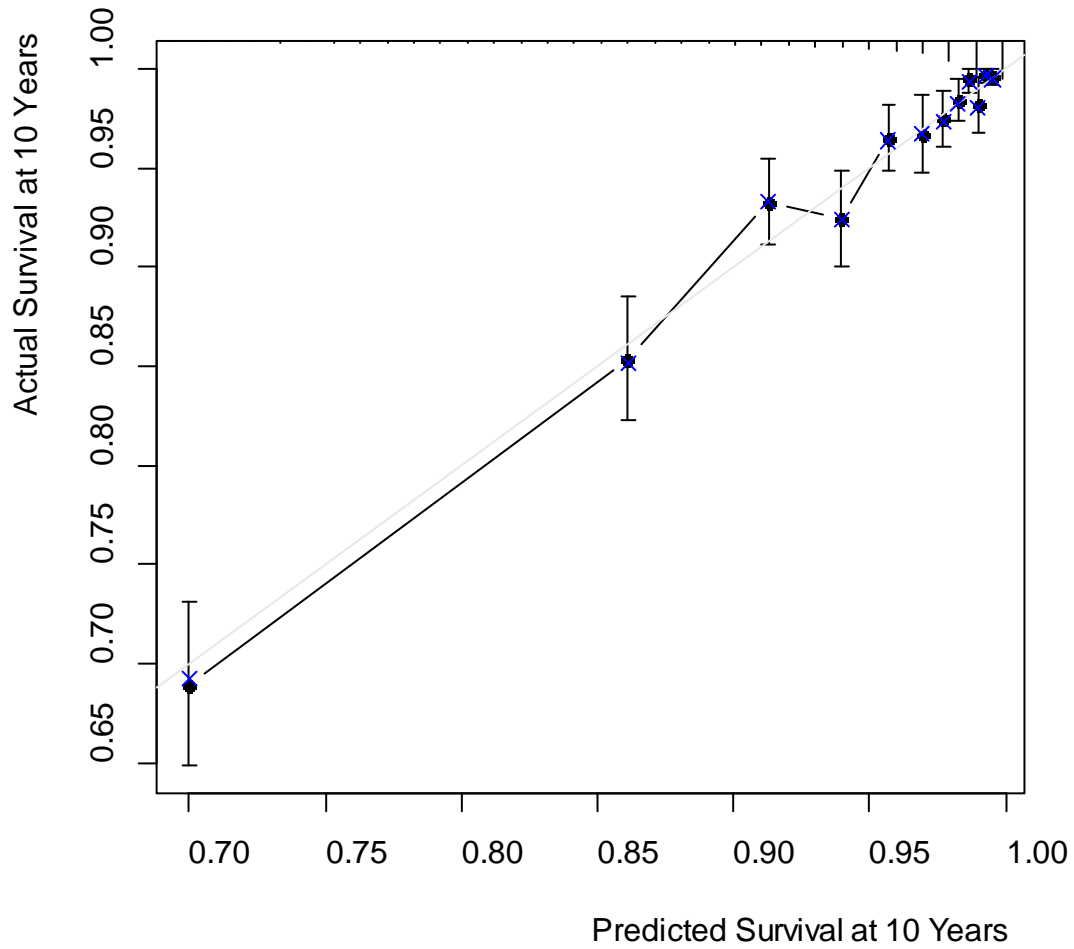

**eFigure 1A.** Bootstrap estimates of calibration accuracy for the final Cox models in women (derivation cohort,  $n = 12,152$ ). Dots correspond to predictive accuracy, and Xs mark bootstrap corrected estimated. The plotted curve (solid line) tracks well with the ideal curve (dashed line).

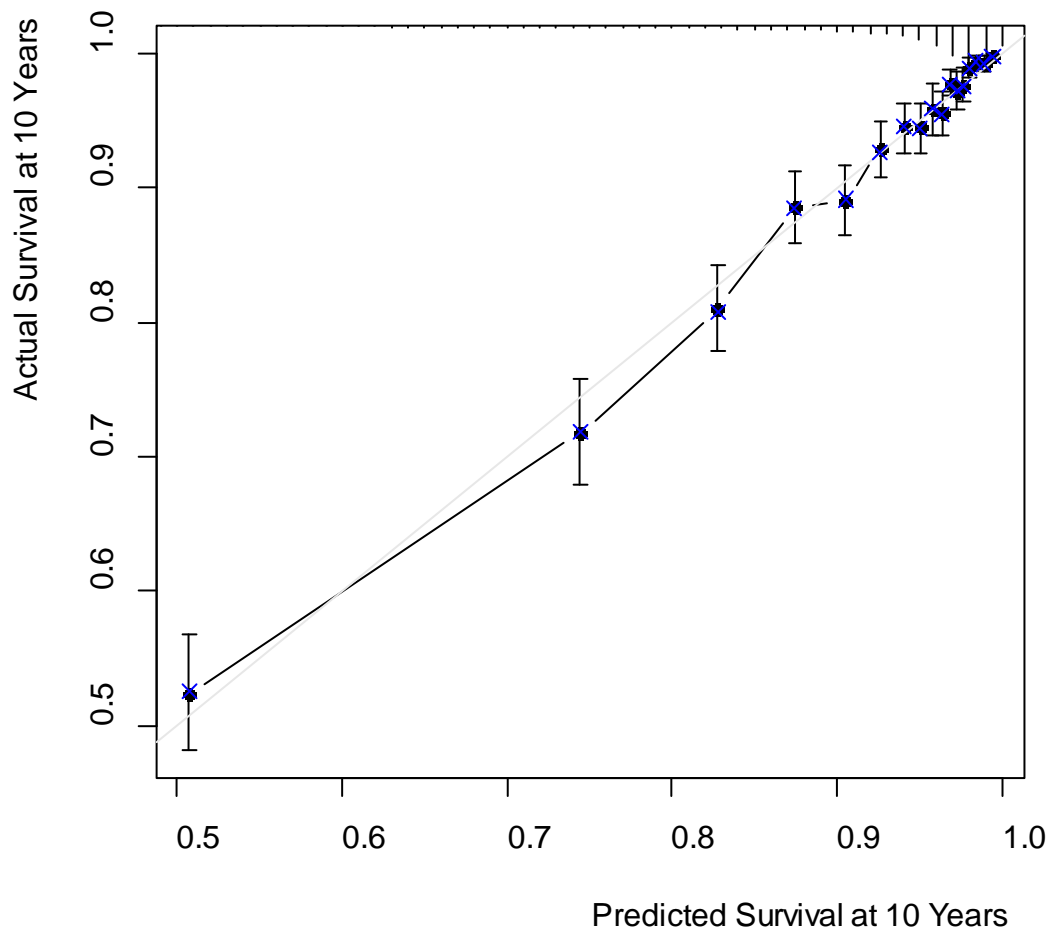

**eFigure 1B.** Bootstrap estimates of calibration accuracy for the final Cox models in men (derivation cohort, n = 17,892). Dots correspond to predictive accuracy, and Xs mark bootstrap corrected estimated. The plotted curve (solid line) tracks well with the ideal curve (dashed line).

**eFigure 2.** ROC Curves in Men and Women in the CCF Validation Cohort

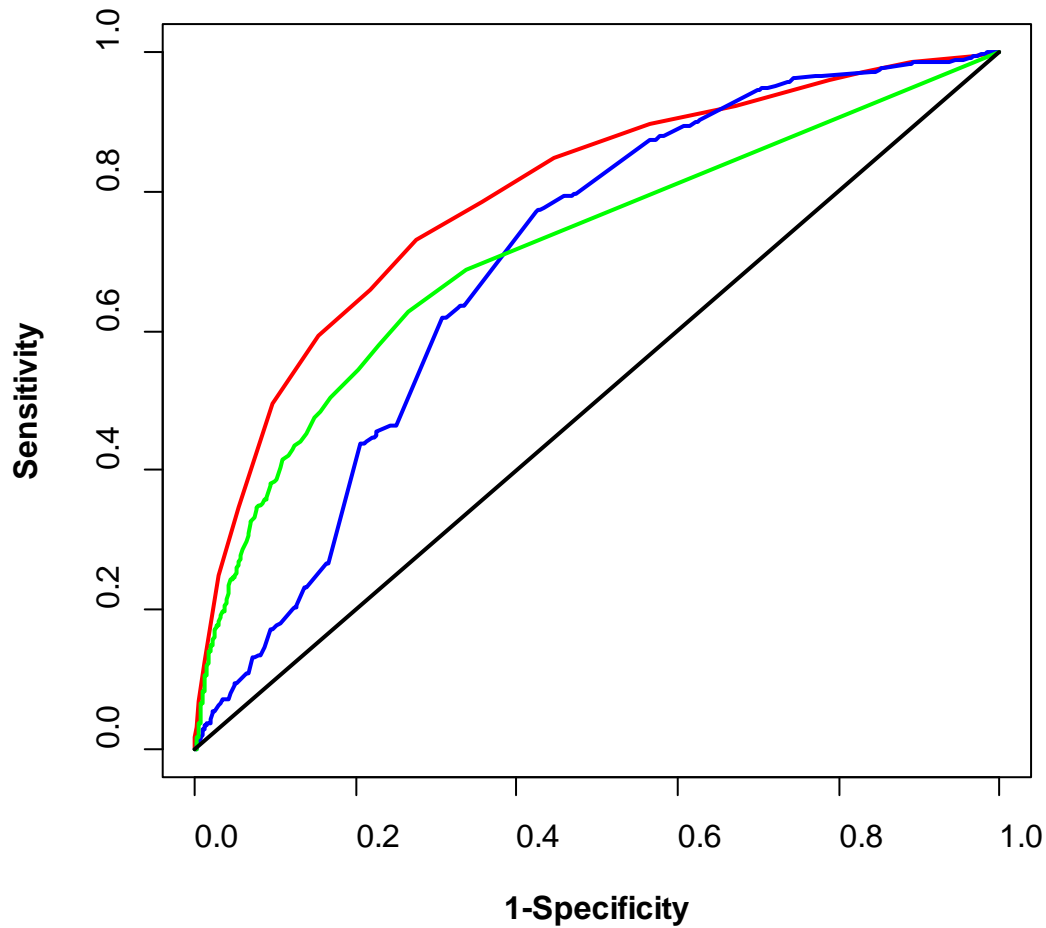

**eFigure 2A.** ROC curves comparing the new sex-specific risk score to the DTS and Lauer nomogram in women in the CCF validation cohort (n = 12,140). The sex-specific NRS is shown in red (C-statistic 0.79), the Lauer nomogram in green (C-statistic 0.74), and the DTS in blue (C-statistic 0.70).

CCF = Cleveland Clinic Foundation, DTS = Duke Treadmill Score, NRS = Sex-specific new risk score, ROC = Receiver operating characteristic

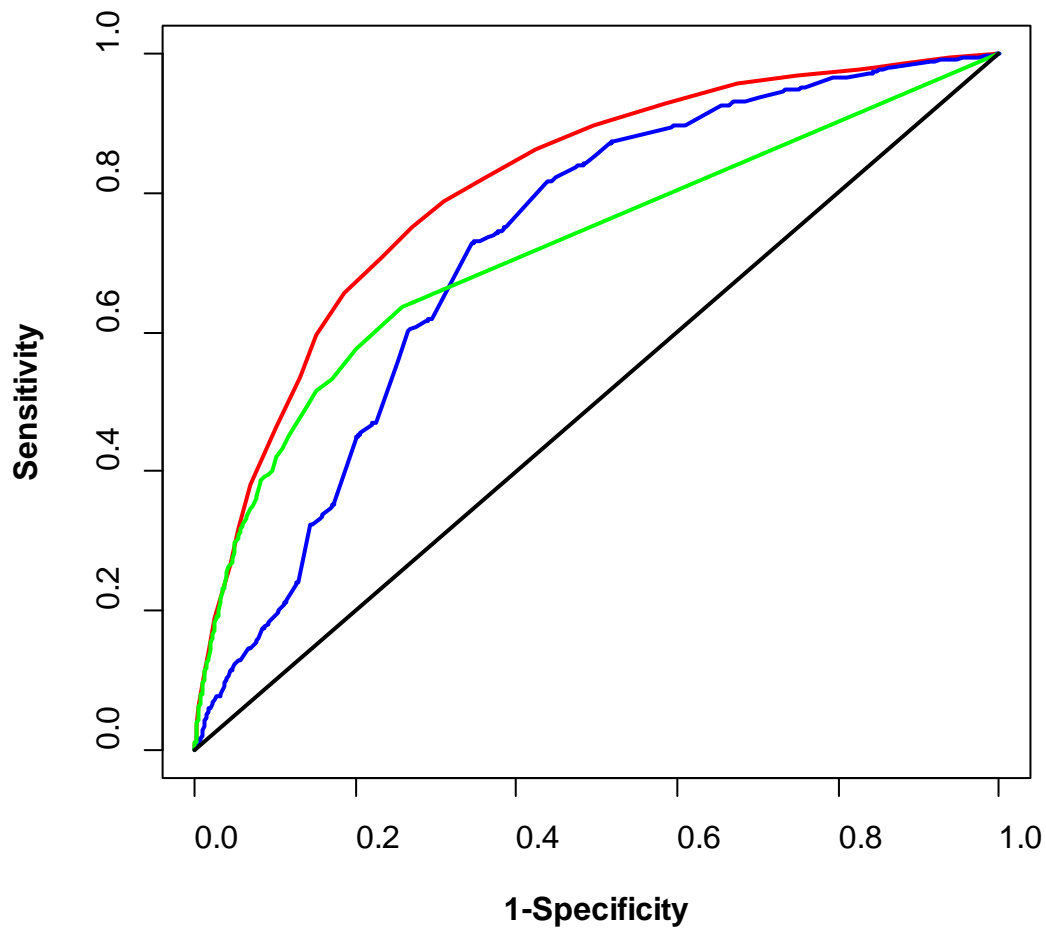

**eFigure 2B.** ROC curves comparing the sex-specific risk score to the DTS and Lauer nomogram in men in the CCF validation cohort (n = 17,693). The sex-specific new risk score is shown in red (C-statistic 0.81), the Lauer nomogram in green (C-statistic 0.75), and the DTS in blue (C-statistic 0.72).

CCF = Cleveland Clinic Foundation, DTS = Duke Treadmill Score, NRS = Sex-specific new risk score, ROC = Receiver operating characteristic
